# Supplementary material for: Regulation of miR319b-Targeted SlTCP10 during the Tomato Response to Low-Potassium Stress
Source: MDPI journal article supplement (doi:10.3390/ijms24087058), 2023-04-11

## Supporting Information

**Table S1 PCR primer sequences used for vector construction and qRT-PCR analysis primer sequences.**

| Name                                 | Sequence(5'-3')                                       |
|--------------------------------------|-------------------------------------------------------|
| <i>GeneRacer RNA Oligo</i>           | CGACUGGAGCACGAGGACACUGACAUGGACUGAAGGAGUAGAAA          |
| <b>GeneRacer 5' Primer</b>           | CGACTGGAGCACGAGGACACTGACA                             |
| <i>GeneRacer 5'Nested primer</i>     | GGACACTGACATGGACTGAAGGAGTA                            |
| <b>SITCP10-RACE</b>                  | ATTAGGAGAAGCAGAGTCATGATGT                             |
| <b>SITCP10-RACE_nested</b>           | TGGCACTTGAAAATCAGTAGTAAAA                             |
| <b>SITCP1-RACE</b>                   | GTCAAGAAGCAGTAAAAAATGTAGC                             |
| <b>SITCP1-RACE_nested</b>            | AAATGTAGCCTGCTCCTCTTCCCCT                             |
| <b>TCP10-F (vector construction)</b> | gccatatg ATGAAGAGCGCAACTGGAGGAG                       |
| <b>TCP10-R (vector construction)</b> | gcctcgag GCATTAGGAGAAGCAGAGTCA                        |
| <b>SIJA2-F(vector construction)</b>  | cagtTTTCGCAGCATCTAACGAGCTCTTCGgatcatgggtgtcaagaaaaaga |

---

|                                     |                                                    |
|-------------------------------------|----------------------------------------------------|
| <b>SIJA2-R(vector construction)</b> | cgatTTTCGCAGCATCTAACGAGCTCTTCGctactgcttgaacccgagat |
| <b>JA2 promoter-F</b>               | TCTATCCGTCCCTATTTAGTT                              |
| <b>JA2 promoter-R</b>               | TAATAGCCGACCTTATCG                                 |
| <b>Bar-F</b>                        | GAAGTCCAGCTGCCAGAAA                                |
| <b>Bar-R</b>                        | CACCATCGTCAACCACTACAT                              |
| <b>SIJA2-CR-gRNA1</b>               | TGCAATTAAGTTTACCACC                                |
| <b>SIJA2-CR-gRNA2</b>               | CTAGACCGAATCGAGTAGC                                |
| <b>miR319b-RT</b>                   | GTCGTATCCAGTGCAGGGTCCGAGGTATTCGCACTGGATACGACAGGGAG |
| <b>miR319b-F</b>                    | GAGTGTTGACTGAAGGGACA                               |
| <b>miR319b-R</b>                    | GCAGGGTCCGAGGTATTC                                 |
| <b>JA2-F</b>                        | CAAAGCTAGATGAATGGGTGCT                             |
| <b>JA2-R</b>                        | GAATTTCTCGGCCTTGAGAGA                              |
| <b>JA2p-EMSA</b>                    | TTTATTTAGATTCATGTATTTGGTCCAAAACCTTACTGCTCGATAAGGTC |

---

---

|                    |                        |
|--------------------|------------------------|
| <b>Actin</b>       | ACCGAAGCCCCTCTTAACCC   |
| <b>(reference)</b> | GTATGGCTGACACCATCACC   |
| <b>U6</b>          | CATCCGATAA AATTGGAACGA |
| <b>(reference)</b> | TTTGTGCGTGTCATCCTTGCG  |

---

**Figure S1 The plant phenotype of JZ34 and OE-SlmiR319 with low potassium treatment 21days.**

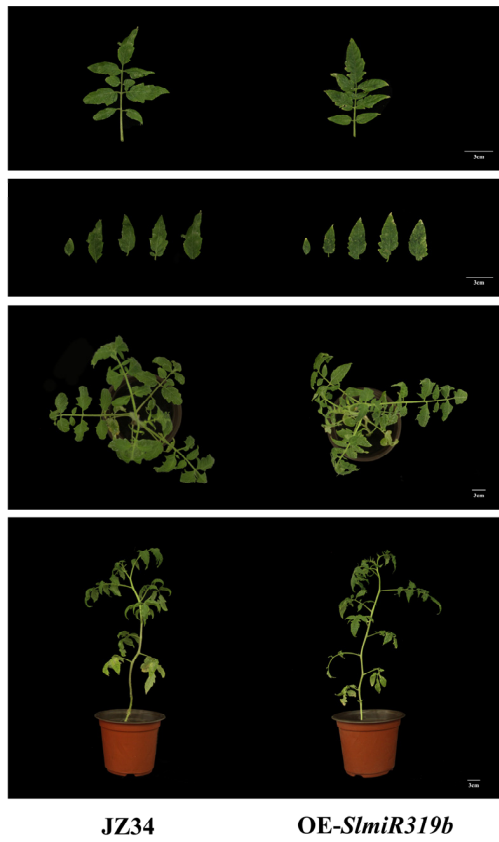

**Figure S2 The root hair phenotype of sit mutants and WT under the normal condition and low potassium (LK) treatment 7d.**

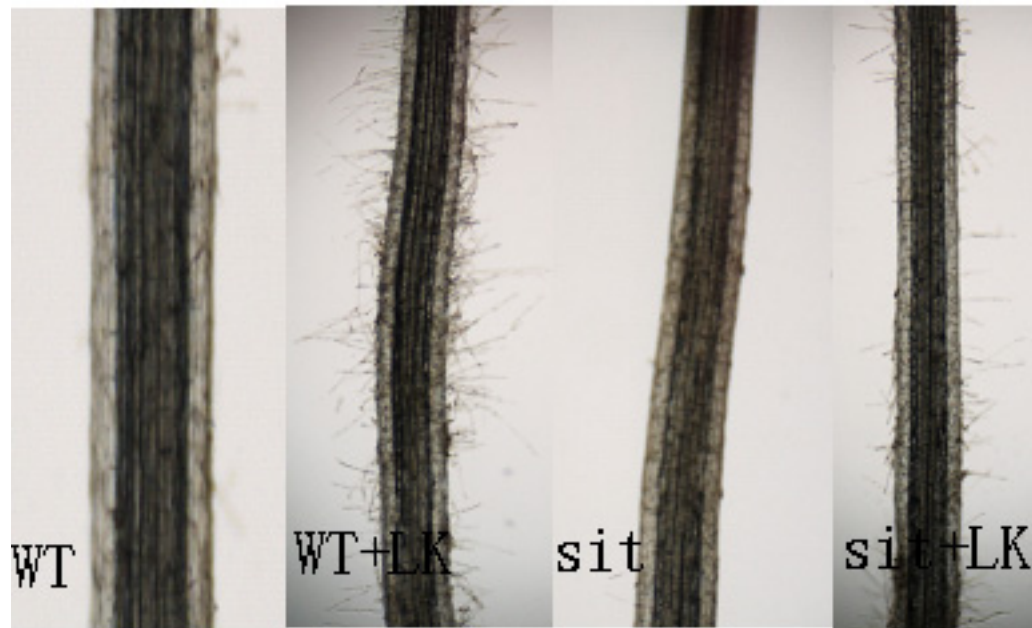

Supplement: s1 [file s1]
